# Supplementary material for: Asymmetric Intrastromal Corneal Ring Segments with Progressive Base Width and Thickness for Keratoconus: Evaluation of Efficacy and Analysis of Epithelial Remodeling
Source: MDPI journal article supplement (doi:10.3390/jcm12041673), 2023-02-20
Supplement: s1 [file s1]

**Table S1.** Keratoconus screening indices (n=33).

|                                                    | Preoperative                             | M6                                      | $\Delta$                                  | P-value*         |
|----------------------------------------------------|------------------------------------------|-----------------------------------------|-------------------------------------------|------------------|
| <b>Anterior surface</b>                            |                                          |                                         |                                           |                  |
| <b>SIF</b>                                         | 10.31 $\pm$ 3.14                         | 6.42 $\pm$ 3.08                         | -3.89 $\pm$ 2.83                          | <b>&lt;0.001</b> |
| <b>3 mm (D)</b>                                    | [3.14 to 15.69]                          | [0.71 to 12.94]                         | [-11.79 to 0.73]                          |                  |
| <b>RMS/A</b>                                       | 0.37 $\pm$ 0.11                          | 0.31 $\pm$ 0.09                         | -0.06 $\pm$ 0.09                          | <b>&lt;0.001</b> |
| <b>6 mm (<math>\mu\text{m}/\text{mm}^2</math>)</b> | [0.11 to 0.60]                           | [0.13 to 0.51]                          | [-0.26 to 0.17]                           |                  |
| <b>KvF (<math>\mu\text{m}</math>)</b>              | 45.36 $\pm$ 14.81<br>[12.60 to 80.60]    | 39.89 $\pm$ 12.46<br>[17.30 to 74.70]   | -5.46 $\pm$ 9.69<br>[-28.90 to 8.60]      | <b>&lt;0.001</b> |
| <b>CSIF (D)</b>                                    | 3.62 $\pm$ 2.09<br>[-0.62 to 7.53]       | 0.81 $\pm$ 2.38<br>[-4.84 to 4.43]      | -2.81 $\pm$ 2.06<br>[-7.61 to 1.06]       | <b>&lt;0.001</b> |
| <b>EIF (<math>\mu\text{m}</math>)</b>              | 45.33 $\pm$ 14.79<br>[12.63 to 80.56]    | 33.57 $\pm$ 14.53<br>[1.53 to 60.63]    | -11.76 $\pm$ 19.13<br>[-75.99 to 8.59]    | <b>&lt;0.001</b> |
| <b>EIF Axis (<math>^\circ</math>)</b>              | 259.30 $\pm$ 30.42<br>[201.00 to 319.00] | 127.00 $\pm$ 29.49<br>[49.00 to 356.00] | -132.30 $\pm$ 25.44<br>[-74.00 to 52.00]  | 0.17             |
| <b>Posterior surface</b>                           |                                          |                                         |                                           |                  |
| <b>SIB</b>                                         | 1.86 $\pm$ 0.68                          | -0.14 $\pm$ 0.89                        | -2.00 $\pm$ 0.68                          | <b>&lt;0.001</b> |
| <b>3 mm (D)</b>                                    | [0.67 to 3.70]                           | [-2.09 to 1.55]                         | [-3.79 to -0.38]                          |                  |
| <b>RMS/A</b>                                       | 0.80 $\pm$ 0.27                          | 1.07 $\pm$ 0.32                         | -0.26 $\pm$ 0.22                          | <b>&lt;0.001</b> |
| <b>6 mm (<math>\mu\text{m}/\text{mm}^2</math>)</b> | [0.30 to 1.50]                           | [0.71 to 2.05]                          | [-0.24 to 0.87]                           |                  |
| <b>KvB (<math>\mu\text{m}</math>)</b>              | 89.82 $\pm$ 25.52<br>[37 to 131.50]      | 73.36 $\pm$ 29.74<br>[27.10 to 136.70]  | -16.46 $\pm$ 24.99<br>[-68.00 to 25.70]   | <b>&lt;0.001</b> |
| <b>CSIB (D)</b>                                    | 1.22 $\pm$ 0.81<br>[0.04 to 3.22]        | 1.90 $\pm$ 0.79<br>[0.03 to 3.69]       | 0.68 $\pm$ 0.52<br>[-1.15 to 1.59]        | <b>&lt;0.001</b> |
| <b>EIB (<math>\mu\text{m}</math>)</b>              | 89.82 $\pm$ 25.52<br>[36.95 to 131.48]   | 62.71 $\pm$ 38.94<br>[8.35 to 136.71]   | -27.11 $\pm$ 28.80<br>[-99.81 to 21.83]   | <b>&lt;0.001</b> |
| <b>EIB Axis (<math>^\circ</math>)</b>              | 260.79 $\pm$ 31.48<br>[215.00 to 318.00] | 244.33 $\pm$ 71.27<br>[49.00 to 356.00] | -16.45 $\pm$ 69.22<br>[-269.00 to 100.00] | 0.09             |

\*Wilcoxon signed-rank test. All values are presented as the mean  $\pm$  standard deviation and [range]. Significant results are indicated in bold. M6: 6 months after surgery;  $\Delta$ : difference between values obtained six months after surgery and those obtained before surgery; D = diopters; SIF: symmetry index front; RMA/A = root mean square per unit of area; KvF = position and elevation of the highest point of ectasia on the anterior corneal surface; CSIF = center surrounding index of the anterior curvature ; EIF = ectatic index of the anterior surface; SIB: symmetry index back; KvB = position and elevation of the highest point of ectasia on the posterior corneal surface; CSIB = center surrounding index of the posterior curvature ; EIB = ectatic index of the posterior surface
